# Supplementary material
Source: Springer Nature journal article supplement (https://www.springermedizin.de/resource/supplementary/12947_2009_258_MOESM2_ESM.pdf/9556558)

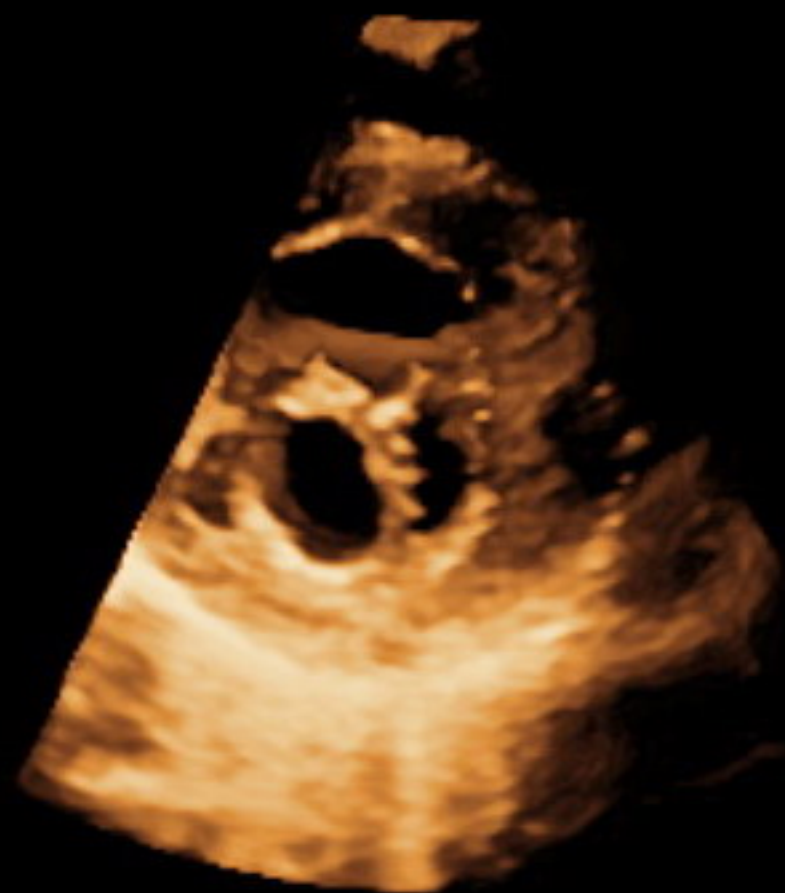

Supplement: MOESM2 [file 9556558]
